# Supplementary material for: A systems view of type 2 diabetes-associated metabolic perturbations in saliva, blood and urine at different timescales of glycaemic control
Source: Springer Nature journal article supplement (doi:10.1007/s00125-015-3636-2), 2015-06-06

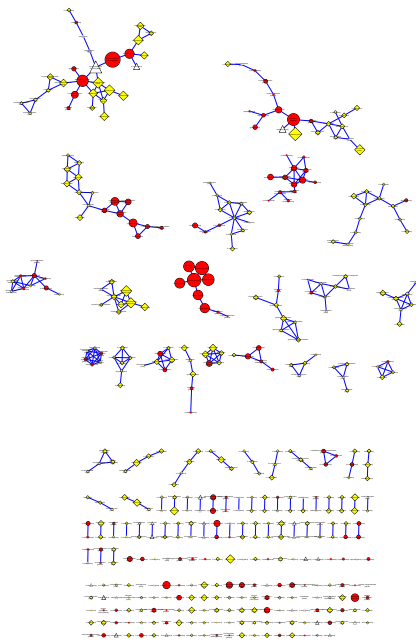

Supplement: MOESM7 [file 8093068]
